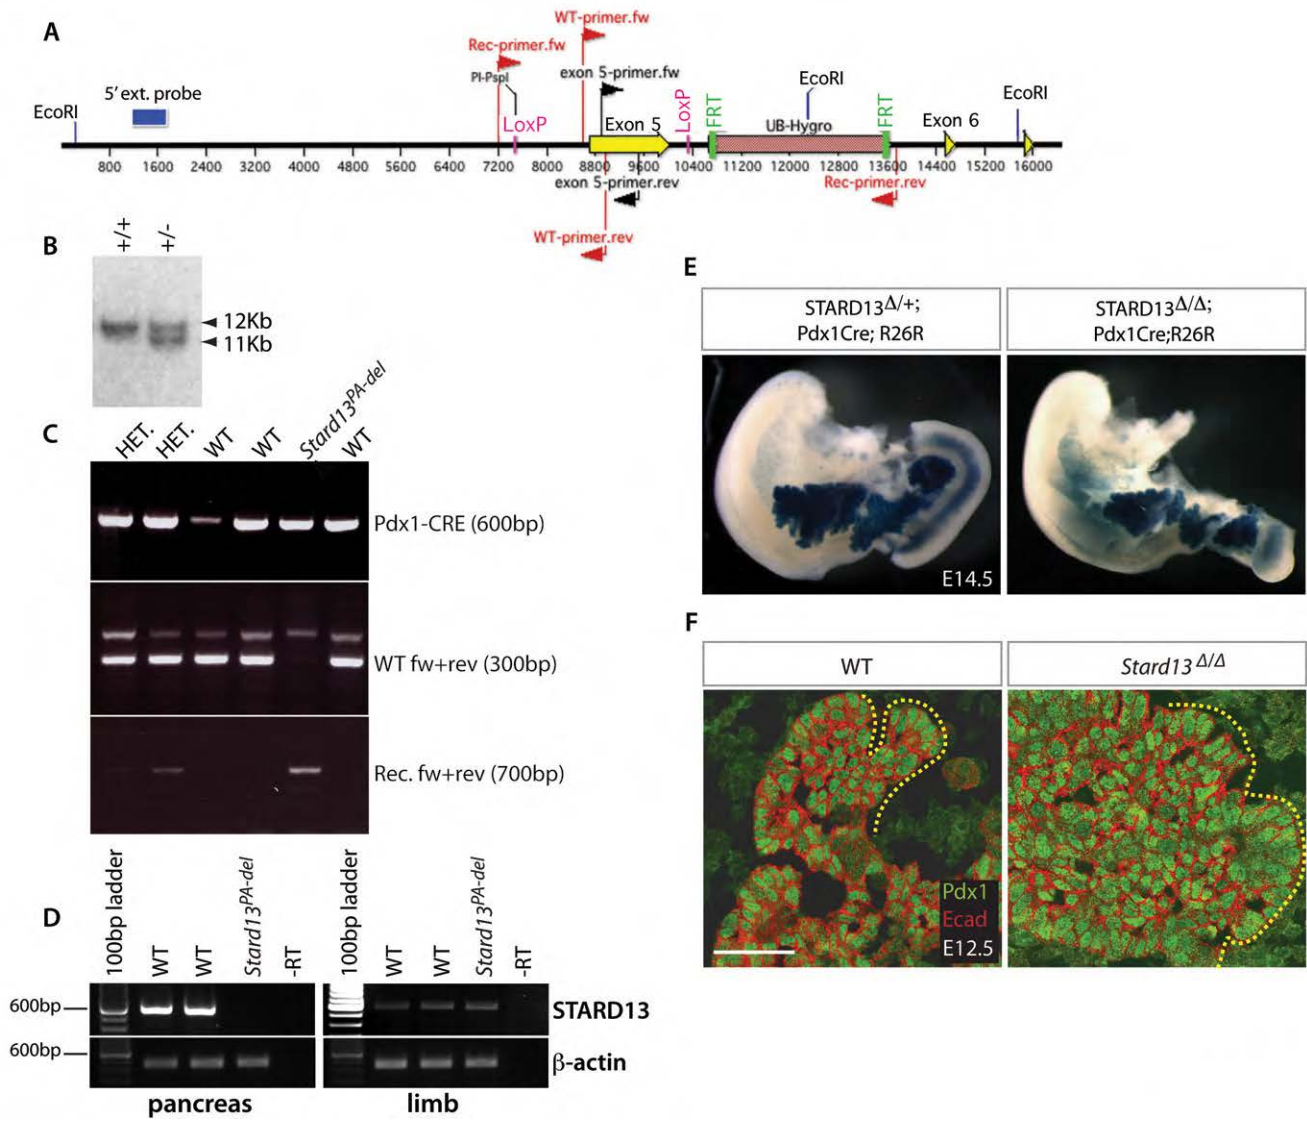

**Fig. S1. Generation of pancreas-specific *Stard13*<sup>PA-deleted</sup> mice.** (A) Schematic representation of the targeted *Stard13*<sup>fllox</sup> allele, indicating the loxP sites (in pink) flanking exon 5 of the gene, FRT-flanked-Hygromycin, *EcoRI* restriction sites, 5' external probe (blue) and primers used for genotyping. Upon Cre-mediated recombination, excision of exon 5, which codes for amino acid residues 12-453, would fully inactivate the gene, introducing a frameshift mutation and premature stop codon, which results in a null *Stard13* allele. (B) Targeted ES cells and founder mice tails were identified by Southern blot analysis with restriction enzyme *EcoRI* and 5' external probe. Upon digestion of genomic DNA with *EcoRI*, expected shift in size between WT (12.3 kb) and targeted (11.7 kb) allele was detected. (C) Deletion *in vivo* of the conditional allele in *Stard13*<sup>fllox/fllox</sup>; *Pdx1*-Cre pancreatic cells. PCR on genomic DNA of E18.5 pancreatic rudiments for *Pdx1*-Cre transgene, wild-type (WT fw+rev primers) and recombined allele (Rec. fw+rev primers). In *Stard13*<sup>PA-deleted</sup> that carries the *Pdx1*-Cre transgene the recombined allele, but not the wild-type allele, was amplified, whereas the wild-type allele was detected in controls (HET or WT). (D) RT-PCR analysis of *Stard13* in pancreatic and forelimb tissue from WT and *Stard13*<sup>PA-deleted</sup> E14.5 embryos detected the transcript in both WT tissues, in the forelimb of *Stard13*<sup>PA-deleted</sup> embryos, but not in *Stard13*<sup>PA-deleted</sup> pancreas, indicating tissue-specific gene ablation.  $\beta$ -actin was used as control. (E) X-Gal staining in both *Stard13*<sup>N/+</sup>; *Pdx1*-Cre; ROSA26R<sup>+/-</sup> and *Stard13*<sup>N/N</sup>; *Pdx1*-Cre; ROSA26R<sup>+/-</sup> indicated efficient Cre recombination, showing almost uniform blue staining in the pancreas at E14.5. R26R indicator mice were obtained from the Jackson Laboratory [Gt(ROSA)26Sortm1Sor] (Soriano, 1999). Pancreatic size difference was evident between HET and mutant. (F) Immunofluorescence analysis of E12.5 WT and *Stard13*<sup>N/N</sup> pancreases using antibodies against Pdx1 and E-cadherin (Ecad). Deletion of *Stard13* in all tissues (*Stard13*<sup>N/N</sup>) using the CMV-Cre transgenic strain (Schwenk et al., 1995) led to a pancreatic-specific phenotype as observed in *Stard13*<sup>PA-deleted</sup> embryos, suggesting a tissue-specific activity of the RhoGAP *Stard13*. Scale bar: 50  $\mu$ m.

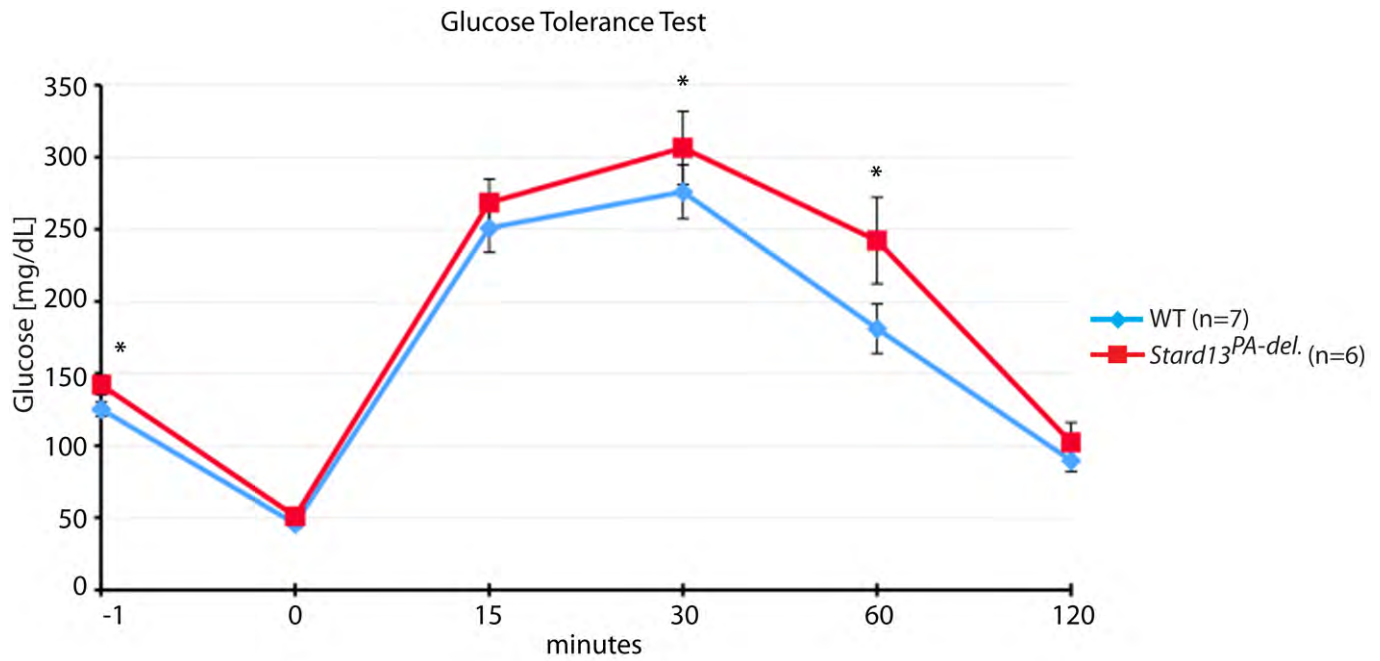

**Fig. S2. Loss of *Stard13* leads to a mild glucose intolerance adult phenotype.** Glucose levels were measured from blood collected from the tail immediately before the glucose challenge (time point 0) and 15, 30, 60 and 120 minutes after the glucose injection using a blood glucose meter (Contour, Bayer). Data are expressed as means  $\pm$  s.e.m. The level of statistical significance was determined using Student's two-tailed *t*-test when the difference between the means of two populations was considered.  $P < 0.05$  was considered statistically significant. These results are in line with previous observations (Hammar et al., 2009). Finally, defects in glucose metabolism might explain the postnatal growth retardation that we observed in *Stard13*<sup>PA-deleted</sup> animals.

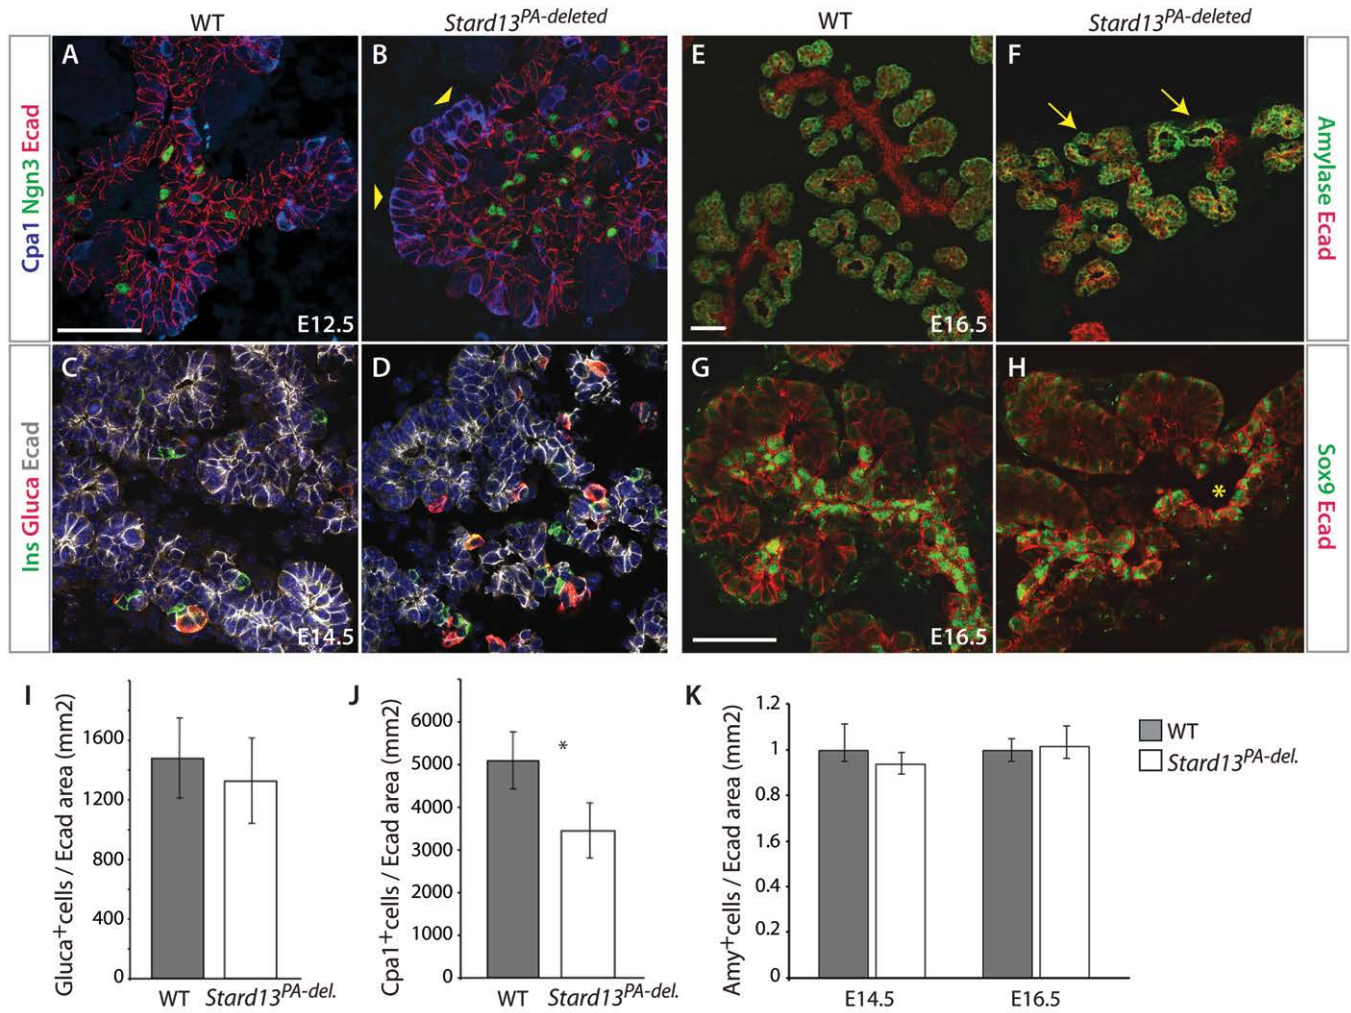

**Fig. S3. *Stard13* ablation does not influence pancreatic lineage allocation.** WT and *Stard13*<sup>PA-deleted</sup> pancreas sections were stained with antibodies against the three main pancreatic cell lineages. (A) The transcription factor *Ngn3* (*Neurog3*) is the earliest recognisable marker of endocrine progenitors, which subsequently give rise to mature endocrine cells. In the E12.5 WT, *Ngn3*<sup>+</sup> (green) and *Cpa1*<sup>+</sup> cells (blue) displayed typical distribution in the trunk and at the tips of the branching epithelium, respectively. (B) In the *Stard13*<sup>PA-deleted</sup> *Ngn3*<sup>+</sup> cells trunk location was maintained, whereas *Cpa1*<sup>+</sup> cells distribution was disorganised (arrowheads). (C,D) Endocrine cells expressing insulin (*Ins*) or glucagon (*Gluca*) cells were detected in both WT (C) and *Stard13*<sup>PA-deleted</sup> (D) E14.5 pancreases. Blue, Hoechst nuclear counterstain. (E-H) At E16.5, exocrine cells (amylase<sup>+</sup>) and duct cells (*Sox9*<sup>+</sup>) were found in both WT (E,G) and *Stard13*<sup>PA-deleted</sup> pancreases (F,H). Arrows indicate malformed acini (F) in the *Stard13*<sup>PA-deleted</sup> pancreas. The ductal network architecture was severely perturbed, showing discontinuous ducts (asterisk) and absence of typical branching tree-pattern in the mutant (H). (I) Quantification of differentiated endocrine cells (*Gluca*<sup>+</sup>) versus total *Ecad*<sup>+</sup> area showed no change. *n*=3. (J) Quantification of progenitor *Cpa1*<sup>+</sup> cells versus total *Ecad*<sup>+</sup> area showed reduction in *Stard13*<sup>PA-deleted</sup> at E14.5, which is consistent with their decreased proliferative activity at E12.5 (Fig. 1F). Similarly, 30% reduction of *Cpa1*<sup>+</sup> cells versus *Pdx1*<sup>+</sup> cells was measured in the mutant pancreas (*Cpa1*<sup>+</sup>/*Pdx1*<sup>+</sup> cells in E14.5 *Stard13*<sup>PA-deleted</sup> pancreas=20±3.2 %; *Cpa1*<sup>+</sup>/*Pdx1*<sup>+</sup> cells in E14.5 WT pancreas=30±4 %). *n*=3. (K) No difference was observed in the relative number of exocrine cells (*Amy*<sup>+</sup>/*Ecad*<sup>+</sup>) between WT and *Stard13*<sup>PA-deleted</sup> pancreas at E14.5 and E16.5. *n*=3. Error bars represent ± s.e.m. \**P*<0.05. Scale bars: 50 µm.



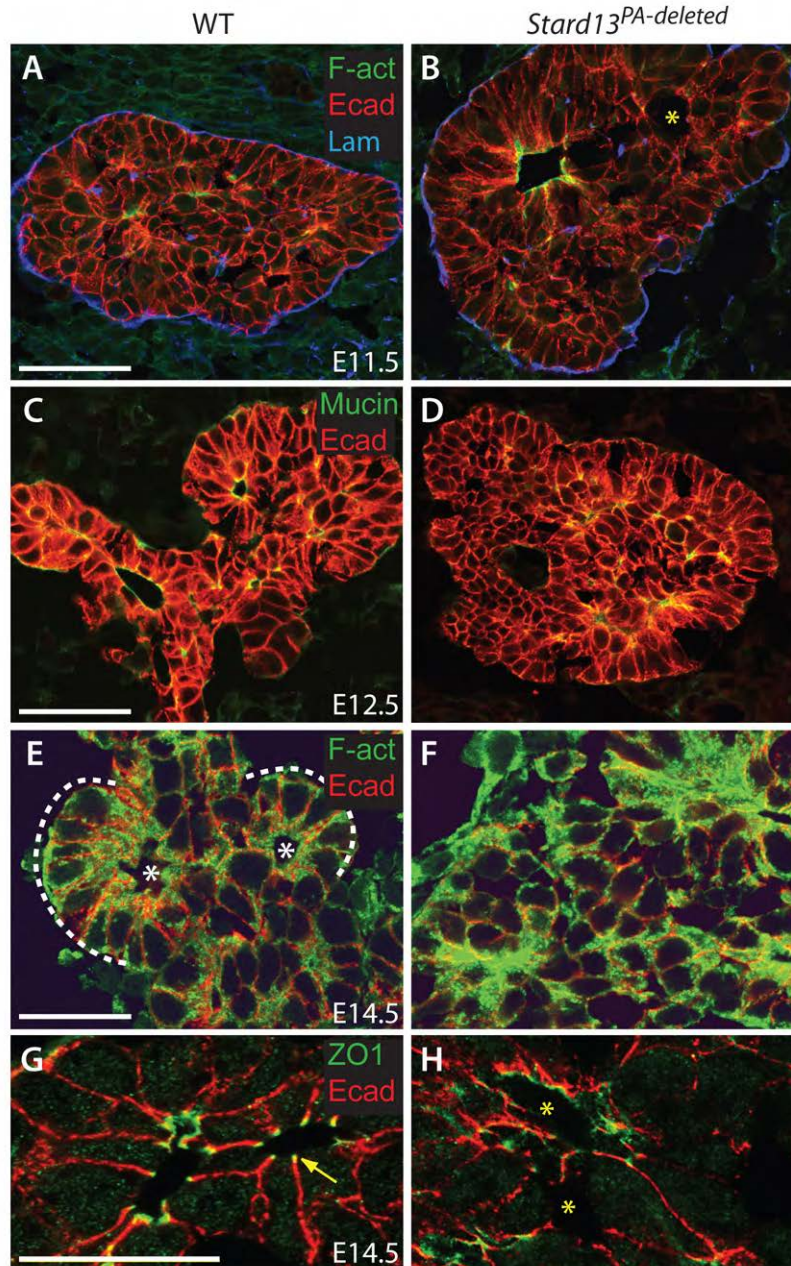

**Fig. S4. Distribution of epithelial polarity markers in the developing pancreas.** (A,B) WT and *Stard13*<sup>PA-deleted</sup> pancreatic sections were analysed for epithelial cell organisation with immunostaining for laminin (Lam), F-actin (F-act) and Ecad at E11.5. Microlumens were detected within the WT pancreatic epithelium and F-actin staining was properly distributed at the apical surface of the cells lining the lumens (A). In E11.5 *Stard13*<sup>PA-deleted</sup> pancreas, microlumens were not detected. By contrast, larger inner cavities surrounded by non-polarised cells with continuous E-cadherin membrane staining were found (B; asterisk). (C,D) Immunostaining for Mucin and Ecad at E12.5. *Stard13*<sup>PA-deleted</sup> cells display stratified and compact epithelial organisation with rare microlumens (D). (E,F) Immunostaining for F-act and Ecad at E14.5. *Stard13*<sup>PA-deleted</sup> cells display abnormal accumulation of F-actin (F). White outlines and asterisks indicate branches and lumens at E14.5, respectively (E). In the WT pancreas, F-actin filament meshwork normally underlay the apical pole, displaying a ratio of apical to basal mean fluorescence intensity between 1.5-1.6 A.U. on average, as measured by Image J. By contrast, in the absence of *Stard13* the measurable accumulation of F-actin at the basal pole is higher than in the control, resulting into a lower ratio of apical to basal mean fluorescence intensity (1.3-1.4 AU). This result suggests not only accumulation but also mislocalisation of the F-actin filaments in the absence of *Stard13*. (G,H) In E14.5 WT pancreatic epithelium, ZO-1 expression was detected at the apical edge of the junctional complex (arrow). In *Stard13*<sup>PA-deleted</sup> pancreas, newly forming lumens surrounded by either polarised or non-polarised cells were present (H). Asterisks indicate cavity surrounded by non-polarised cells. Scale bars: 50  $\mu$ m (A-F); 20  $\mu$ m (G,H).

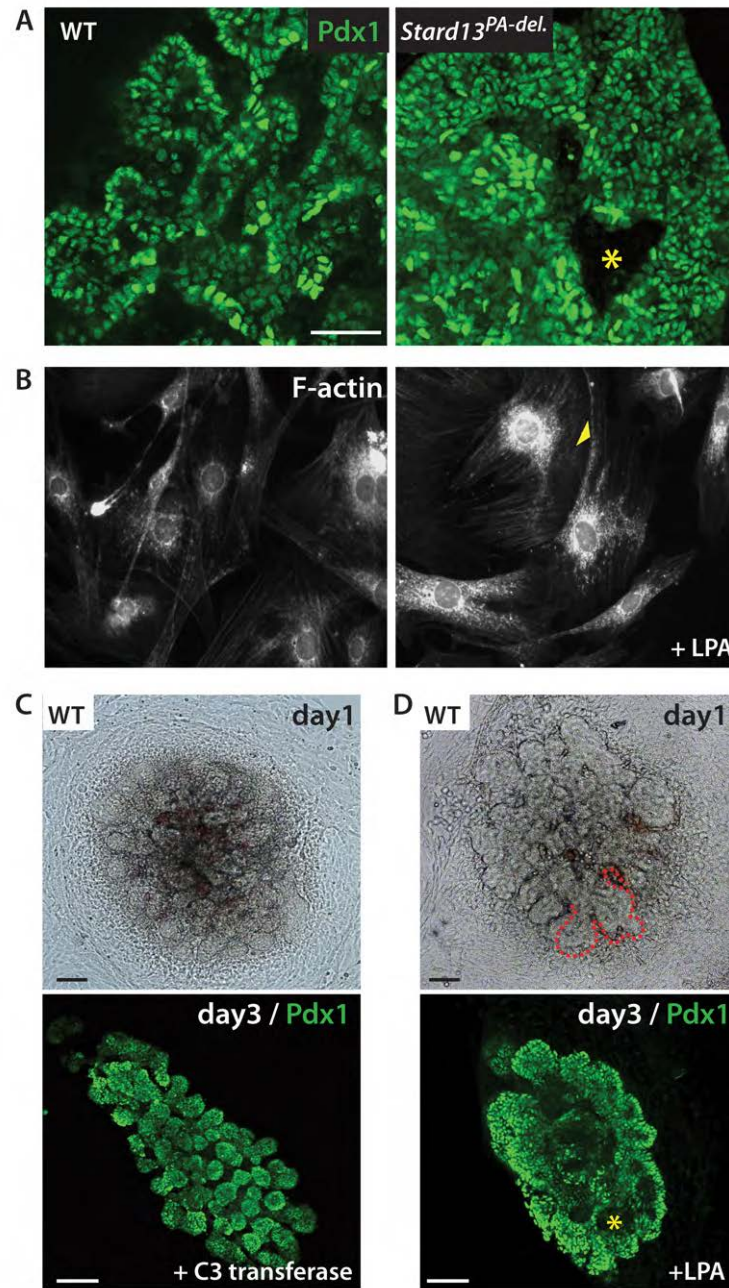

**Fig. S5. Pharmacological activation or inhibition of the Rho signaling.** (A) Whole-mount immunostaining for Pdx1 on WT explants showed tubules of Pdx1+ cells undergoing extensive branching by 48 hours of cultures. In *Stard13<sup>PA-del.</sup>*, pancreatic cells expressed Pdx1, but lacked tubules and typical branching organisation, as *in vivo*. Asterisk indicates internal cavity. (B) Activity of the LPA bioactive phospholipid was tested in embryonic fibroblast cultures using standard assays, such as staining of F-actin cytoskeleton with Alexa 488-phalloidin. Quiescent serum-starved mouse embryonic fibroblasts showed F-actin+ stress fibres. LPA treatment promoted flattening and increase in stress-fibre density (see yellow arrowhead), as result of RhoA activation. (C) Rho GTPase activity was selectively blocked through the use of a membrane-permeable version of the enzyme C3 transferase. E11.5 WT dorsal pancreases were cultured alone for 24 hours (day 1) and, subsequently, exposed to the C3 transferase during 48 hours. After 4 days, explants were fixed and immunostained with anti-Pdx1. C3 treatment did not perturb normal tubules formation and branching in WT developing pancreas. (D) In Rho activation assay, LPA was added at the final concentration of 10  $\mu\text{g/ml}$  to the culture medium on day 1 and replaced every 24 hours. LPA-mediated activation of Rho reduced cell growth and antagonised tubulogenesis and branching in WT pancreatic epithelium, without affecting Pdx1 expression. Red outline indicates initiation of branching in WT pancreas organ culture after 24 hours in culture. Asterisk indicates internal cavities in LPA-treated explants. Scale bars: 50  $\mu\text{m}$  (A); 100  $\mu\text{m}$  (C,D).

**Table S1. Primer sequences****Genotyping primers**

| Gene                       | Primer       | Sequence                       | Size (bp) |
|----------------------------|--------------|--------------------------------|-----------|
| WT Stard13                 | WT-fw        | CAG TTC CAT GTT GGG TCT TCG T  | 259       |
|                            | WT-rev.      | CCT TCC AGC TGG GGG GTA GG     |           |
| Floxed Stard13 allele      | Lox-fw       | CAG TTC CAT GTT GGG TCT TCG T  | 330       |
|                            | Lox-rev.     | CCA GCT GGC TAG CTG GCA AAC    |           |
| Post-recombination product | Rec-fw.      | CAG TTC CAT GTT GGG TCT TCG T  | 700       |
|                            | Rec-rev.     | AAC ATA CCT TAG ATC TAT TG     |           |
| Pdx1 Cre                   | Pdx1Cre-fw   | tGC CAC GAC CAA GTG ACA GC     | 600       |
|                            | Pdx1Cre-rev. | CCA GGT TAC GGA TAT AGT TCA TG |           |

**RT-qPCR primers**

| Gene                | Accession number | Primer | Sequence                   | Size (bp) |
|---------------------|------------------|--------|----------------------------|-----------|
| 36B4                | NM_007475.5      | F      | GGCCCTGCACTCTCGCTTTC       | 124       |
|                     |                  | R      | TGCCAGGACGCGCTTGT          |           |
| SDHA                | NM_023281.1      | F      | TGT TCA GTT CCA CCC CAC A  | 100       |
|                     |                  | R      | TCT CCA CGA CAC CCT TCT GT |           |
| Srf                 | NM_020493.2      | F      | GGCCGCGTGAAGATCAAGAT       | 159       |
|                     |                  | R      | CACATGGCCTGTCTCACTGG       |           |
| Ctgf                | NM_010217.2      | F      | CCCTAGCTGCCTACCGACT        | 113       |
|                     |                  | R      | CATTCCACAGGTCTTAGAACAG G   |           |
| Vcl                 | NM_009502.4      | F      | GCAACCTCGTCCGGGTTGGAA      | 163       |
|                     |                  | R      | TCCCGCGCAGGAACCGAGTA       |           |
| Mig6                | NM_133753.1      | F      | TGGCCTACAATCTGAACTCCC      | 102       |
|                     |                  | R      | GACCACACTCTGCAAAGAAGT      |           |
| $\beta$ 1-integrin  | NM_010578.2      | F      | GGCGGACGCTGCGAAAAGATG A    | 160       |
|                     |                  | R      | CCACCCACAATTTGGCCCTGCT     |           |
| $\alpha$ 6-integrin | NM_008397.3      | F      | CGGTCTCCGGAGTCGCTAAGC      | 163       |
|                     |                  | R      | TCAAGGTTGCTGTGCCGAGGTT     |           |

**Table S2. List of primary antibodies**

| <b>Antibody</b>           | <b>Raised in</b> | <b>Dilution</b>  | <b>Source</b>                                                   |
|---------------------------|------------------|------------------|-----------------------------------------------------------------|
| Amylase                   | Rabbit           | 1:500            | Sigma                                                           |
| Akt                       | Rabbit           | 1:1000           | Cell Signaling                                                  |
| pAkt                      | Rabbit           | 1:1000           | Cell Signaling                                                  |
| F-actin                   | FITC-conj.       | 1:500-<br>1:750  | Molecular Probes                                                |
| Carboxypeptidase 1        | Rabbit           | 1:500            | AbD Serotec                                                     |
| E-cadherin                | Rat              | 1:500-<br>1:1000 | Invitrogen                                                      |
| ERK1/2                    | Rabbit           | 1:1000           | Cell Signaling                                                  |
| pERK1/2                   | Rabbit           | 1:1000           | Cell Signaling                                                  |
| GAPDH                     | Rabbit           | 1:1000           | Cell Signaling                                                  |
| Glucagon                  | Rabbit           | 1:500            | Immunostar                                                      |
| GST                       | Rabbit           | 1:100            | Santa Cruz                                                      |
| Phospho-Histone H3 (Er10) | Rabbit           | 1:200            | Millipore                                                       |
| Insulin                   | Guinea pig       | 1:250            | Millipore                                                       |
| Laminin                   | Rabbit           | 1:1000           | Sigma                                                           |
| Mig6                      | Rabbit           | 1:100            | Santa Cruz                                                      |
| Mucin                     | Armenian hamster | 1:1000           | Thermo Scientific                                               |
| Phospho-MLC2              | Rabbit           | 1:200            | Cell Signaling                                                  |
| Neurogenin 3              | Guinea pig       | 1:2000           | Gift of M. Sander, UCSD, San Diego, CA, USA                     |
| Pdx1                      | Rabbit           | 1:2000           | Abcam                                                           |
| Pdx1                      | Mouse            | 1:100            | Hybridoma Bank                                                  |
| PKC $\zeta$               | Rabbit           | 1:100            | Santa Cruz                                                      |
| Ptf1a                     | Rabbit           | 1:2500           | Gift of A. Sprinkler, BCBC Antibody Core, Novo Nordisk, Denmark |
| Sox-9                     | Rabbit           | 1:2000           | Gift of M. Wegner, Erlangen University, Germany                 |
| YAP                       | Rabbit           | 1:100            | Cell Signaling                                                  |
| p-YAP                     | Rabbit           | 1:100            | Cell Signaling                                                  |
| ZO-1                      | Rabbit           | 1:100            | Invitrogen                                                      |
